# Supplementary material for: Optimization of a silver-nanoprism conjugated with 3,3′,5,5′-tetramethylbenzidine towards easy-to-make colorimetric analysis of acetaldehyde: a new platform towards rapid analysis of carcinogenic agents and environmental technology
Source: Royal Society of Chemistry journal article supplement (doi:10.1039/d3ra00355h), 2023-01-01
Supplement: d3ra00355h2.pdf [file d3ra00355h2.pdf]

## Supporting Information

### Optimization of silver-nanoprism conjugated with 3,3',5,5'-tetramethylbenzidine towards easy-to-make colorimetric analysis of acetaldehyde: A new platform towards rapid analysis of carcinogenic agents and environmental technology

Fatemeh Farshchi <sup>a</sup>, Arezoo Saadati <sup>b</sup>, Mohammad Hasanzadeh <sup>c,d\*</sup>, Yuqian Liu <sup>e</sup>, Farzad Seidi <sup>e,\*\*</sup>

<sup>a</sup> Fundação Oswaldo Cruz, Instituto Oswaldo Cruz, Laboratório de Biologia Molecular e Doenças Endêmicas, Avenida Brasil no 4365 - Manguinhos, Rio de Janeiro 21040-900, RJ, Brazil.

<sup>b</sup> Central European Institute of Technology, Brno University of Technology, Brno CZ-612 00, Czech Republic.

<sup>c</sup> Pharmaceutical Analysis Research Center, Tabriz University of Medical Sciences, Tabriz, Iran.

<sup>d</sup> Nutrition Research Center, Tabriz University of Medical Sciences, Tabriz, Iran.

<sup>e</sup> Jiangsu Co-Innovation Center for Efficient Processing and Utilization of Forest Resources and International Innovation Center for Forest Chemicals and Materials, Nanjing Forestry University, Nanjing 210037, China.

#### Corresponding Author

\* (Mohammad Hasanzadeh) Pharmaceutical Analysis Research Center, Tabriz University of Medical Sciences, Tabriz, Iran.

E-mail address: (\*) [hasanzadehm@tbzmed.ac.ir](mailto:hasanzadehm@tbzmed.ac.ir);

\*\* (Farzad Seidi)

Jiangsu Co-Innovation Center for Efficient Processing and Utilization of Forest Resources and International Innovation Center for Forest Chemicals and Materials, Nanjing Forestry University, Nanjing 210037, China.

E-mail address: (\*\*) [f\\_seidi@njfu.edu.cn](mailto:f_seidi@njfu.edu.cn);

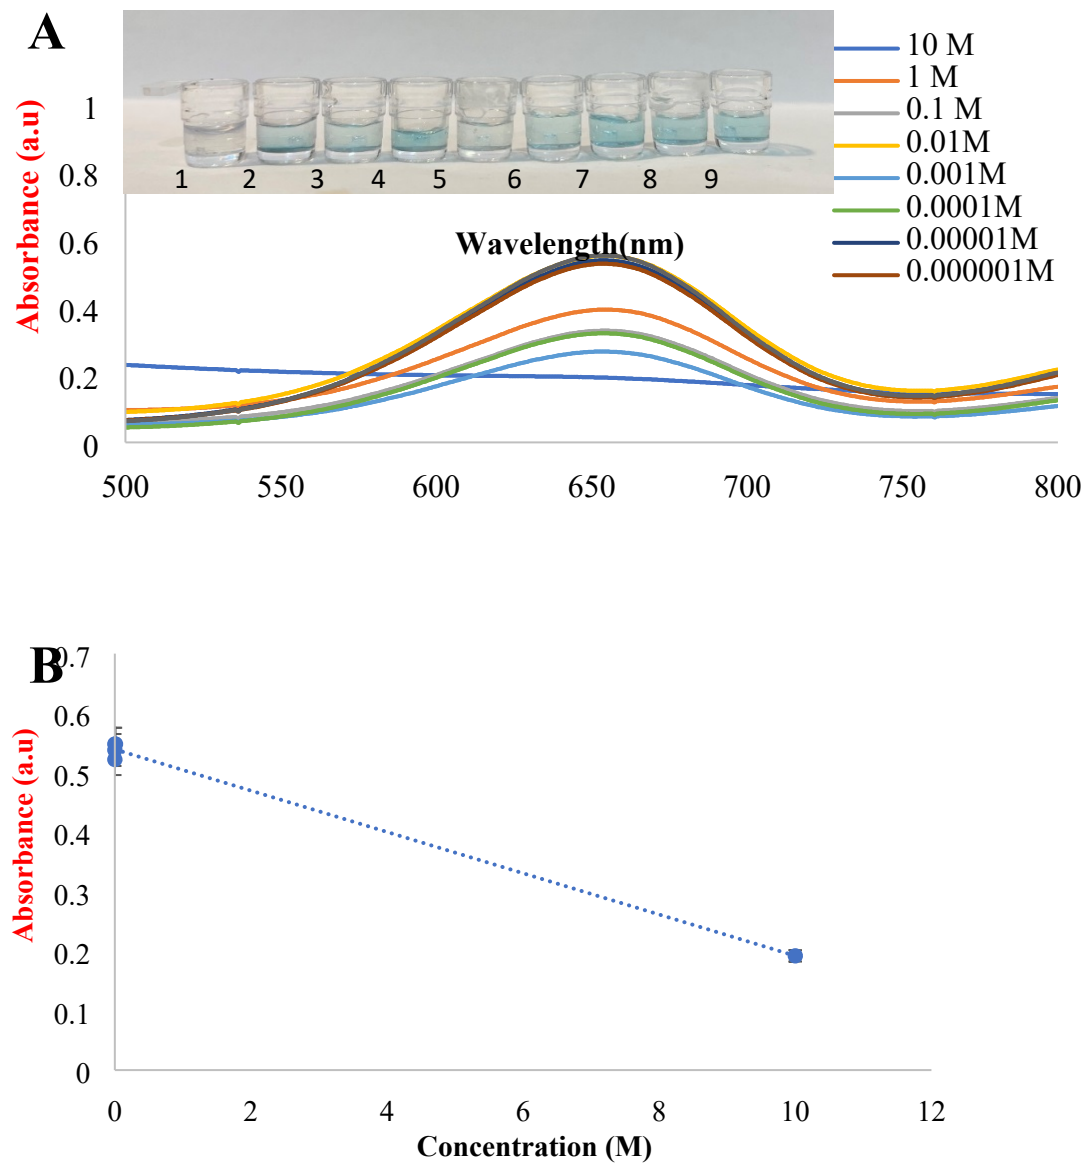

**Fig. S1. A)** Photographic image and UV-Vis spectra recorded from the reaction systems containing AgNPs, (TMB+H<sub>2</sub>O<sub>2</sub>) and different concentration of acetaldehyde (0.000001-0.000001-0.00001-0.0001-0.001-0.01-0.1-1 - 10M), **B)** Calibration curve of peak absorbance versus concentration of acetaldehyde. (n=3, SD=1.34).

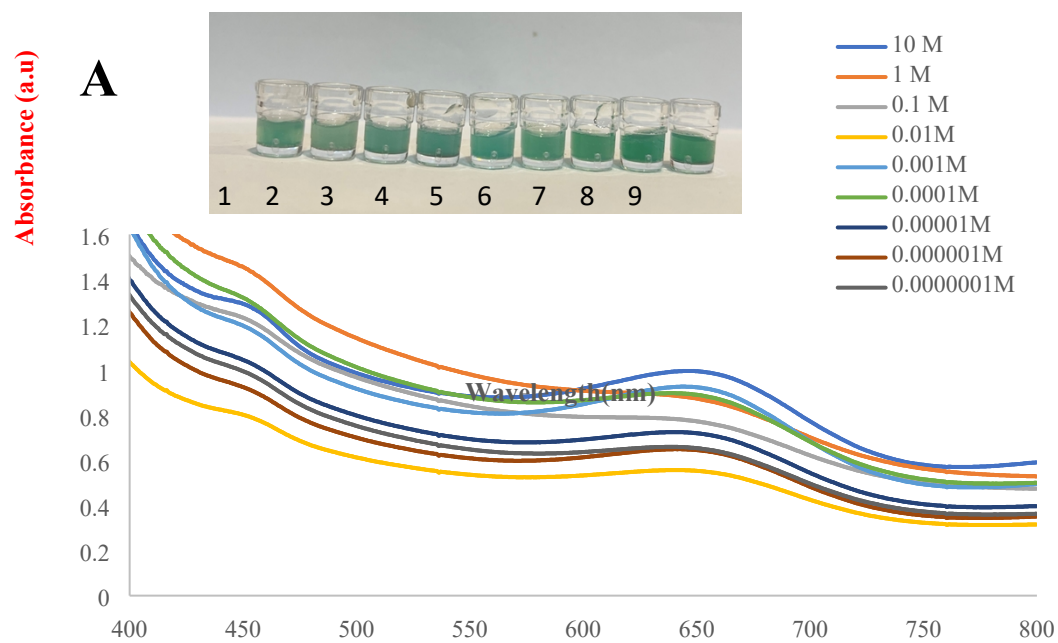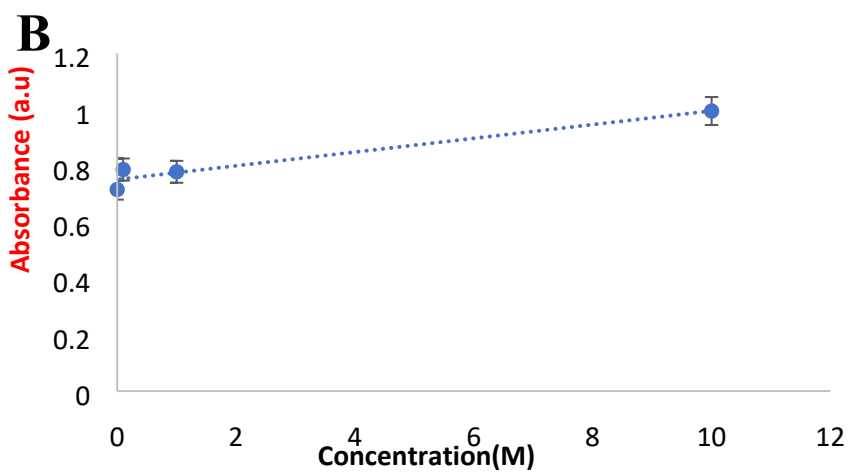

**Fig.S2. A)** Photographic image and UV-Vis spectra recorded from the reaction systems containing AgNWs, (TMB+H<sub>2</sub>O<sub>2</sub>) and different concentration of acetaldehyde (0.000001-0.000001-0.00001-0.0001-0.001-0.01-0.1-1 - 10M), **B)** Calibration curve of peak absorption versus concentration of acetaldehyde. (n=3, SD=2.17).

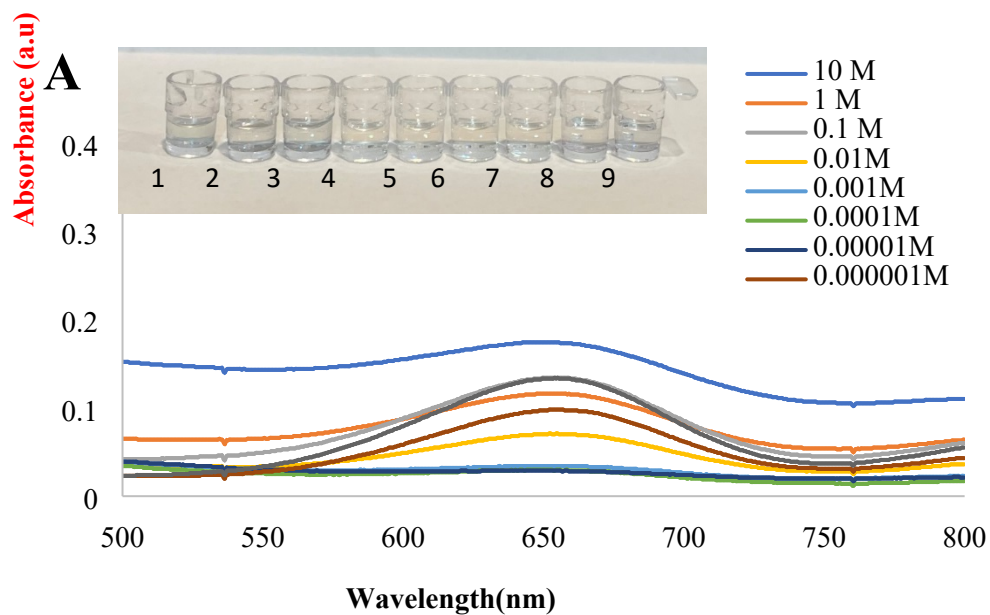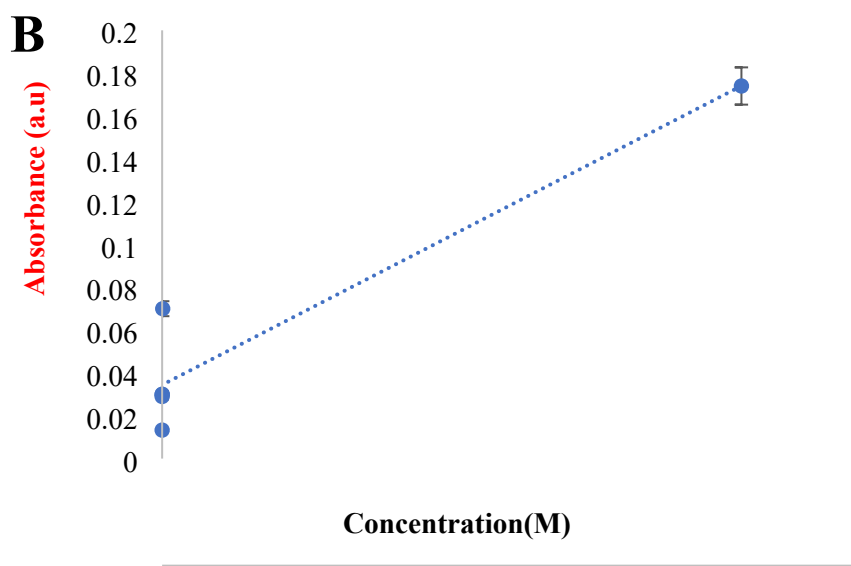

**Fig.S3. A)** Photographic image and UV-Vis spectra recorded from the reaction systems containing AgNPs-Cit, TMB solution and different concentration of acetaldehyde (0.000001-0.000001-0.00001-0.0001-0.001-0.01-0.1-1 -10M), **B)** Calibration curve of peak absorption versus concentration of acetaldehyde. (n=3, SD=2.00).

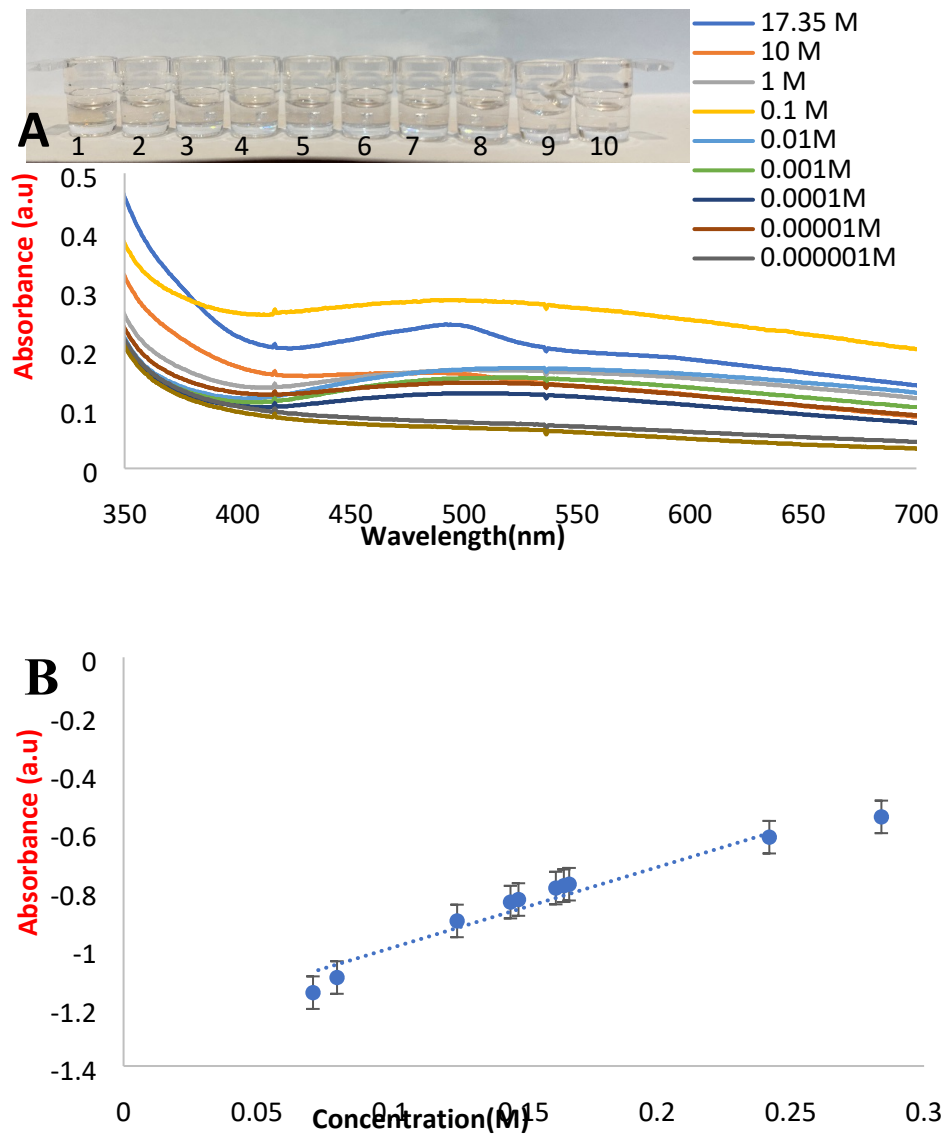

**Fig. S4.** **A)** Absorption response for acetaldehyde with increasing concentrations ( $10^{-7}$  - 17.35M) and AgNPrs in human urine specimens, **B)** Calibration curve. (n=3, SD=1.98).

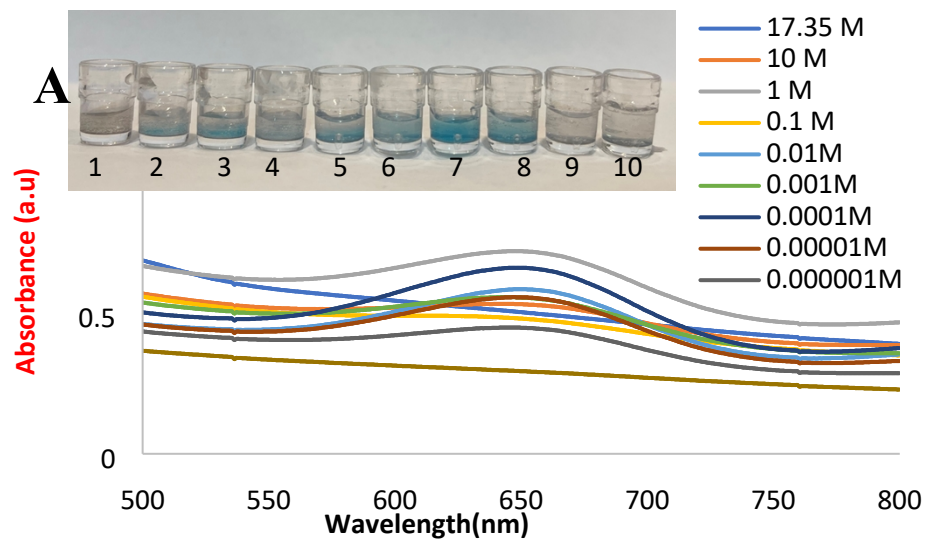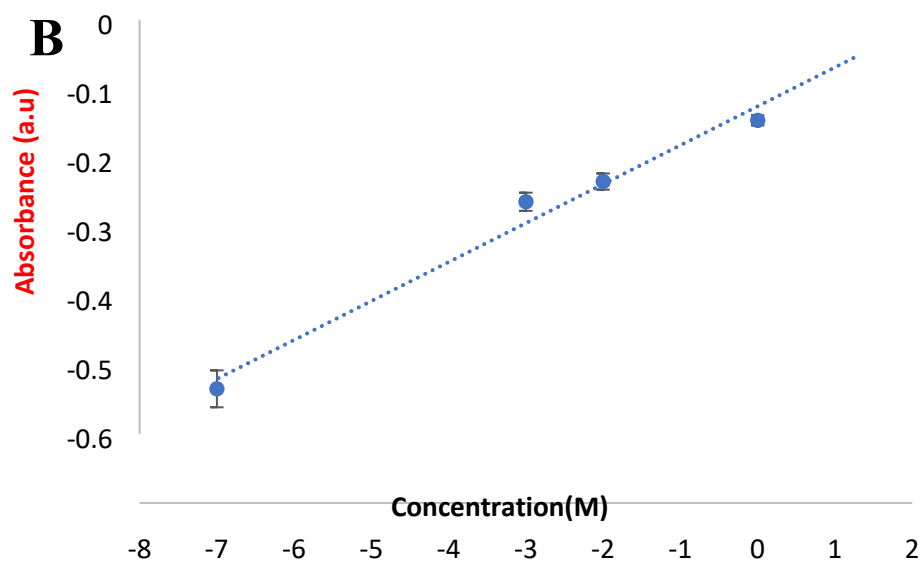

**Fig.S5. A)** Absorption response for acetaldehyde with increasing concentrations ( $10^{-7}$  - 17.35M) and AgNWs in human urine specimens, **B)** Calibration curve. ( $n=3$ ,  $SD=1.27$ ).

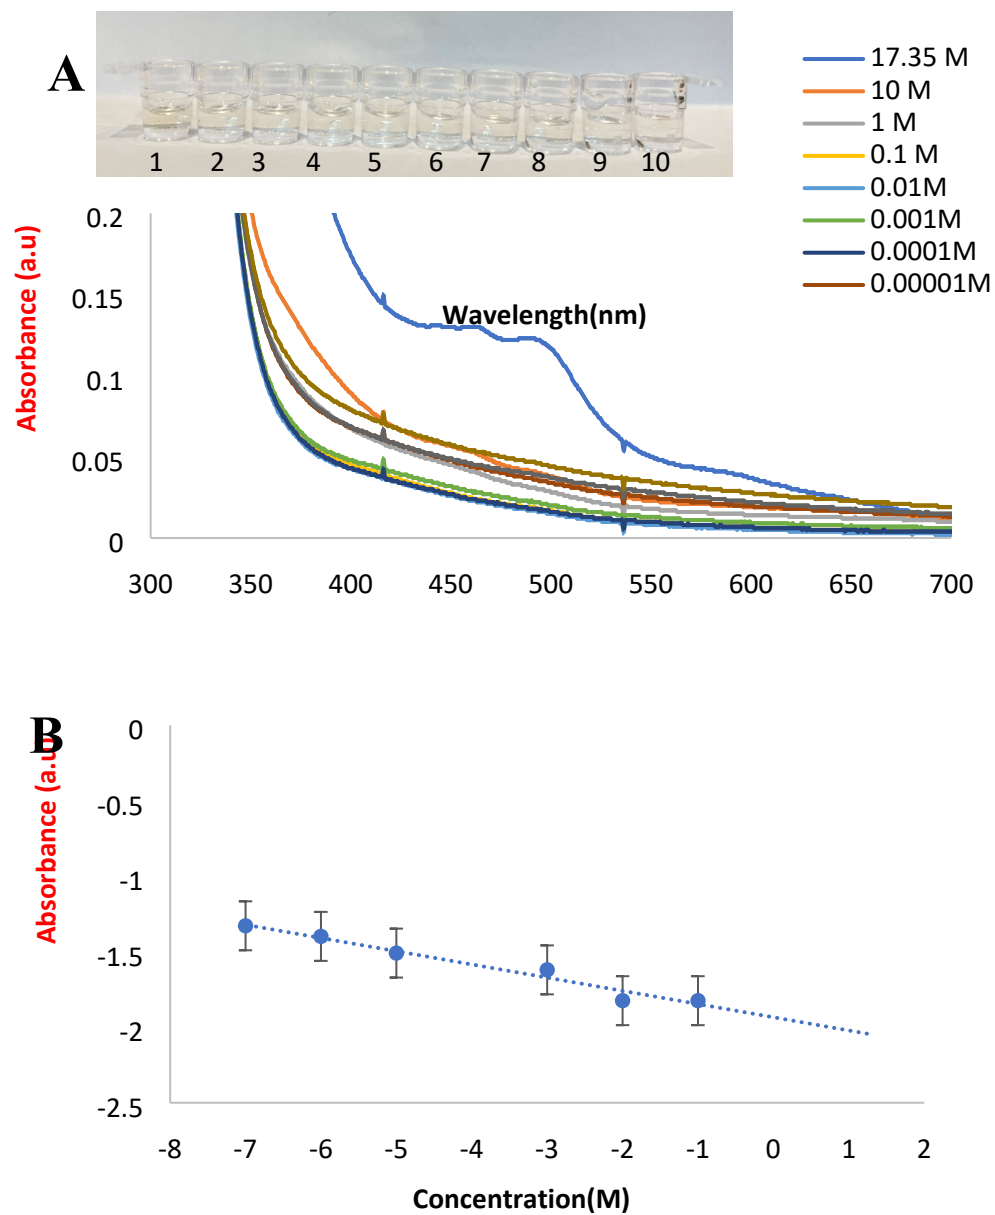

**Fig.S6. A)** Absorption response for acetaldehyde with increasing concentrations ( $10^{-7}$  - 17.35M) and AgNPs-Cit in human urine specimens, **B)** Calibration Curve. (n=3, SD=2.05).
